# Supplementary material
Source: publisher figshare collection journal article supplement (https://geolsoc.figshare.com/ndownloader/files/6433686)

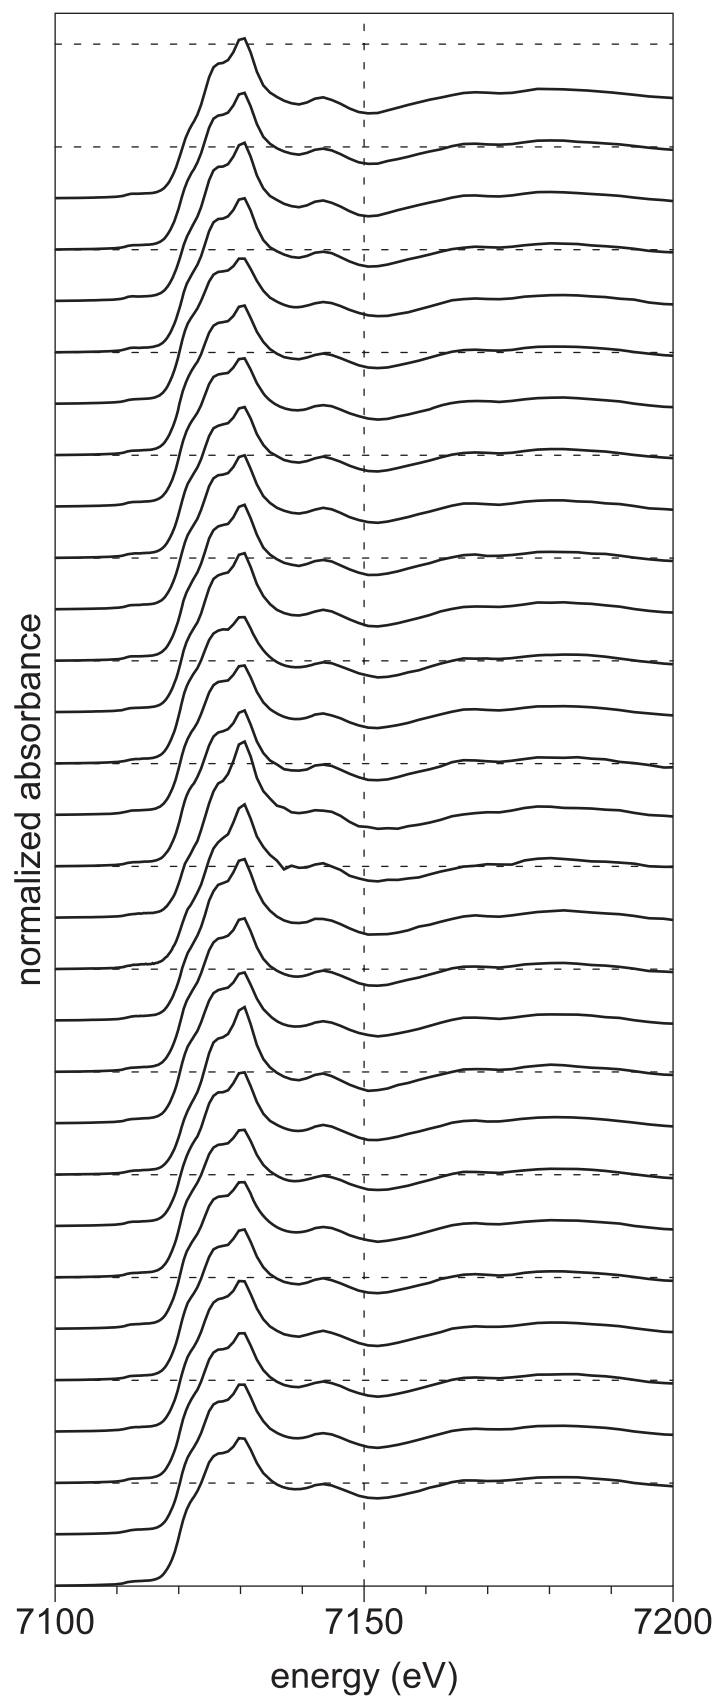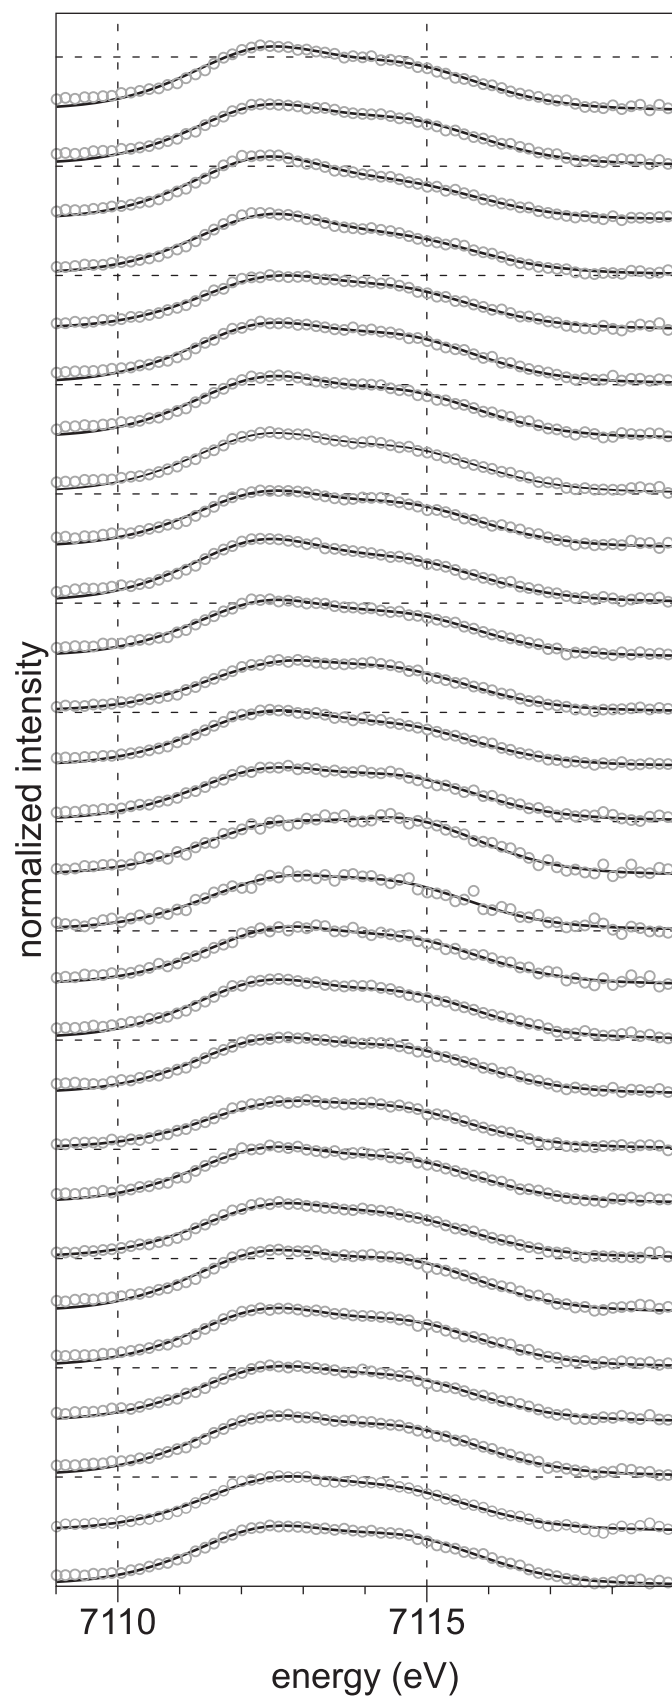

*Supplementary Figure 1. Grosch et al. 2016*

Supplement: Supplementary file 1 [file 6433686]
